# Supplementary material for: Effect of PdNiBi Metal Content: Cost Reduction in Alkaline Direct Ethanol Fuel Cells
Source: MDPI journal article supplement (doi:10.3390/su142215485), 2022-11-21
Supplement: s1 [file s1]

## SUPPLEMENTARY MATERIAL

### Calculation of the layer thickness on the GC-RDE [34]

For the calculation of the approximate layer thickness on the GC-RDE the quantity (m), the density ( $\rho$ ) and the volume (V) of metal, Vulcan XC72R and Nafion Ionomer solution, as well as the area of the GC-RDE ( $A_{GC}$ ) were used. For the different catalysts, the loading ( $\omega$ ) of metal and Vulcan XC72R was also considered.

$$\text{layer thickness} = \frac{\frac{m_{\text{metal}}}{\rho_{\text{metal}}} + \frac{m_{\text{Vulcan XC72R}}}{\rho_{\text{Vulcan XC72R}}} + \frac{m_{\text{Nafion 5 wt.\%}}}{\rho_{\text{Nafion}}}}{A_{GC}}$$

$$m_{\text{metal}} = \frac{m_{\text{catalyst}}}{V_{\text{mixture}}} \cdot V_{\text{catalyst ink}} \cdot \omega_{\text{metal}} (= 0.4 \text{ or } 0.3 \text{ or } 0.2 \text{ or } 0.1)$$

$$m_{\text{Vulcan XC72R}} = \frac{m_{\text{catalyst}}}{V_{\text{mixture}}} \cdot V_{\text{catalyst ink}} \cdot \omega_{\text{Vulcan XC72R}} (= 0.6 \text{ or } 0.7 \text{ or } 0.8 \text{ or } 0.9)$$

$$m_{\text{Nafion 5 wt.\%}} = \frac{\rho_{\text{Nafion 5 wt.\%}} \cdot V_{\text{Nafion 5 wt.\%}} \cdot \frac{5}{100}}{\frac{V_{\text{mixture}}}{V_{\text{catalyst ink}}}}$$

$$m_{\text{catalyst}} = 8.1 \text{ mg for all PdNiBi/C catalysts}$$

$$V_{\text{Nafion 5 wt.\%}} = 13 \text{ }\mu\text{L Nafion ionomer solution}$$

$$V_{\text{mixture}} = 1.75 \text{ mL 2-propanol} + 0.737 \text{ }\mu\text{L ultrapure water} + V_{\text{Nafion 5 wt.\%}} = 2.5 \text{ mL}$$

$$V_{\text{catalyst ink}} = 10 \text{ }\mu\text{L (2 times 5 }\mu\text{L) were applied on GC - RDE}$$

$$A_{GC-RDE} = \text{Area of the GC - RDE} = 0.196 \text{ cm}^2$$

$$\rho_{\text{metal}} = \text{Density of Pd (12.02 g cm}^{-3}\text{) and Ni (8.91 g cm}^{-3}\text{) and Bi (9.78 g cm}^{-3}\text{)}$$

$$\rho_{\text{Nafion}} = 1.98 \text{ g cm}^{-3}$$

$$\rho_{\text{Nafion 5wt.\%}} = 0.94 \text{ g cm}^{-3}$$

$$\rho_{\text{Vulcan XC72R}} = 0.096 \text{ g cm}^{-3}$$

**Table S1:** Results of the layer-thickness calculation on the GC-RDE.

| Catalysts        | Layer thickness / $\mu\text{m}$ |
|------------------|---------------------------------|
| PdNiBi/C (40/60) | 10.5                            |
| PdNiBi/C (30/70) | 12.2                            |
| PdNiBi/C (20/80) | 13.9                            |
| PdNiBi/C (10/90) | 15.6                            |

34. Cermenek, B.; Genorio, B.; Winter, T.; Wolf, S.; Connell, J.G.; Roschger, M.; Letofsky-Papst, I.; Kienzl, N.; Bitschnau, B.; Hacker, V. Alkaline Ethanol Oxidation Reaction on Carbon Supported Ternary PdNiBi Nanocatalyst Using Modified Instant Reduction Synthesis Method. *Electrocatalysis* **2020**, *11*, 203–214. 10.1007/s12678-019-00577-8.

**Table S2.** Chemical composition of the PdNiBi/C active-catalyst material determined by ICP-MS (Bi) and AAS (Pd, Ni) in at.%.

| Catalysts        | measured |      |     | calculated |    |    |
|------------------|----------|------|-----|------------|----|----|
|                  | Pd       | Ni   | Bi  | Pd         | Ni | Bi |
| PdNiBi/C (40/60) | 84.0     | 10.0 | 6.0 | 85         | 10 | 5  |
| PdNiBi/C (30/70) | 84.4     | 10.2 | 5.4 | 85         | 10 | 5  |
| PdNiBi/C (20/80) | 83.3     | 10.4 | 6.3 | 85         | 10 | 5  |
| PdNiBi/C (10/90) | 84.6     | 8.9  | 6.5 | 85         | 10 | 5  |

**Table S3.** XRD data of the Pd<sub>85</sub>Ni<sub>10</sub>Bi<sub>5</sub>/C catalysts.

| Peak No.                      Crystal structure                      Miller indices |                          |                  | Peak Pos. (° 2θ) |                  |                       |                  |                  |                  |
|-------------------------------------------------------------------------------------|--------------------------|------------------|------------------|------------------|-----------------------|------------------|------------------|------------------|
|                                                                                     |                          |                  | PdNiBi/C (40/60) | PdNiBi/C (30/70) | PdNiBi/C (20/80)      | PdNiBi/C (10/90) |                  |                  |
| 1                                                                                   | Graphite(2H)_187640-ICSD | (002)            | 25.414           | 25.447           | 25.513                | 25.480           |                  |                  |
| 2                                                                                   | Pd_64922-ICSD            | (111)            | 39.505           | 39.703           | 39.604                | 39.736           |                  |                  |
| 3                                                                                   | Pd_64922-ICSD            | (200)            | 45.841           | 46.006           | 45.940                | 46.237           |                  |                  |
| 4                                                                                   | Pd_64922-ICSD            | (220)            | 67.027           | 66.796           | 66.664                | 66.664           |                  |                  |
| Peak No.                                                                            | FWHM. (° 2θ)             |                  |                  |                  | Crystallite size (nm) |                  |                  |                  |
|                                                                                     | PdNiBi/C (40/60)         | PdNiBi/C (30/70) | PdNiBi/C (20/80) | PdNiBi/C (10/90) | PdNiBi/C (40/60)      | PdNiBi/C (30/70) | PdNiBi/C (20/80) | PdNiBi/C (10/90) |
| 2                                                                                   | 1.914                    | 3.300            | 3.102            | 3.102            | 4.6                   | 2.7              | 2.8              | 2.8              |

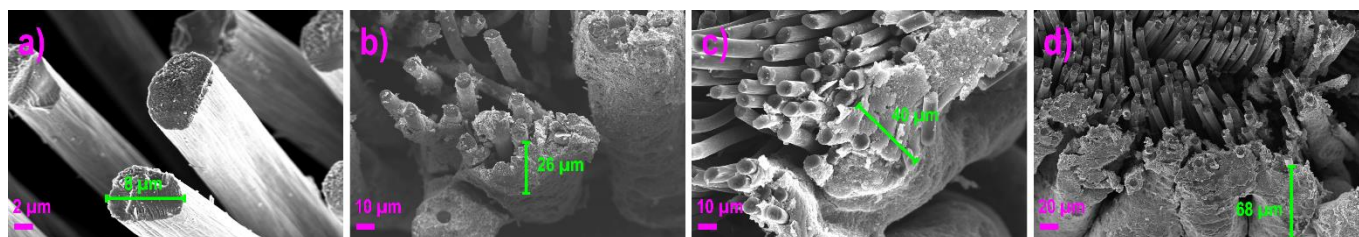

**Figure S1.** SEM images with the dimensioning of the cross section of the different PdNiBi/C electrodes (catalyst on carbon cloth) (a) without catalyst; (b) with PdNiBi/C (40/60); (c) PdNiBi/C (30/70); and (d) PdNiBi/C (20/80).

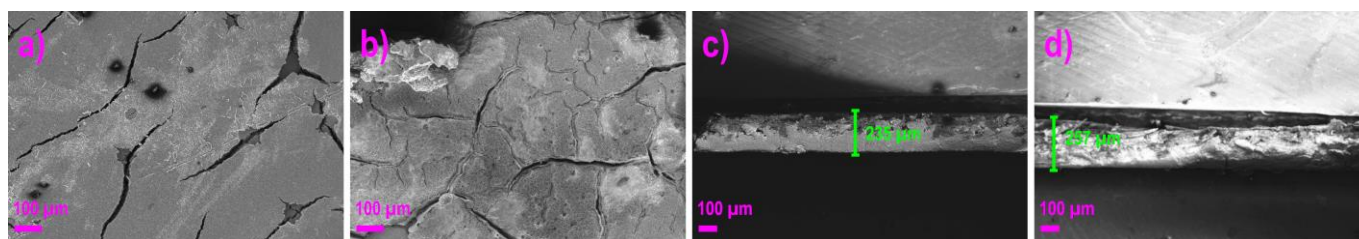

**Figure S2.** SEM images of the PtRu/C cathode electrodes (a) blank carbon paper; (b) carbon paper with catalyst; (c) cross section of the blank carbon paper; (d) cross section of the carbon paper with catalyst.

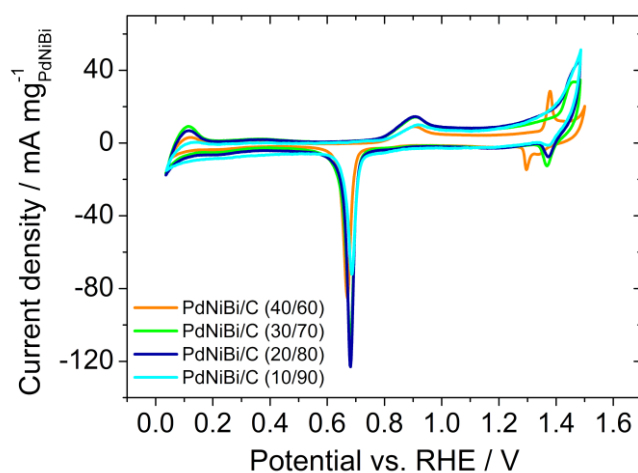

**Figure S3.** Electrochemical characterization of the PdNiBi/C catalysts with a scan rate of  $10 \text{ mV s}^{-1}$  at  $30^\circ\text{C}$  in a potential range from  $0.05 \text{ V} - 1.5 \text{ V}$  vs. RHE in  $\text{N}_2$ -purged  $1 \text{ M KOH}$ .

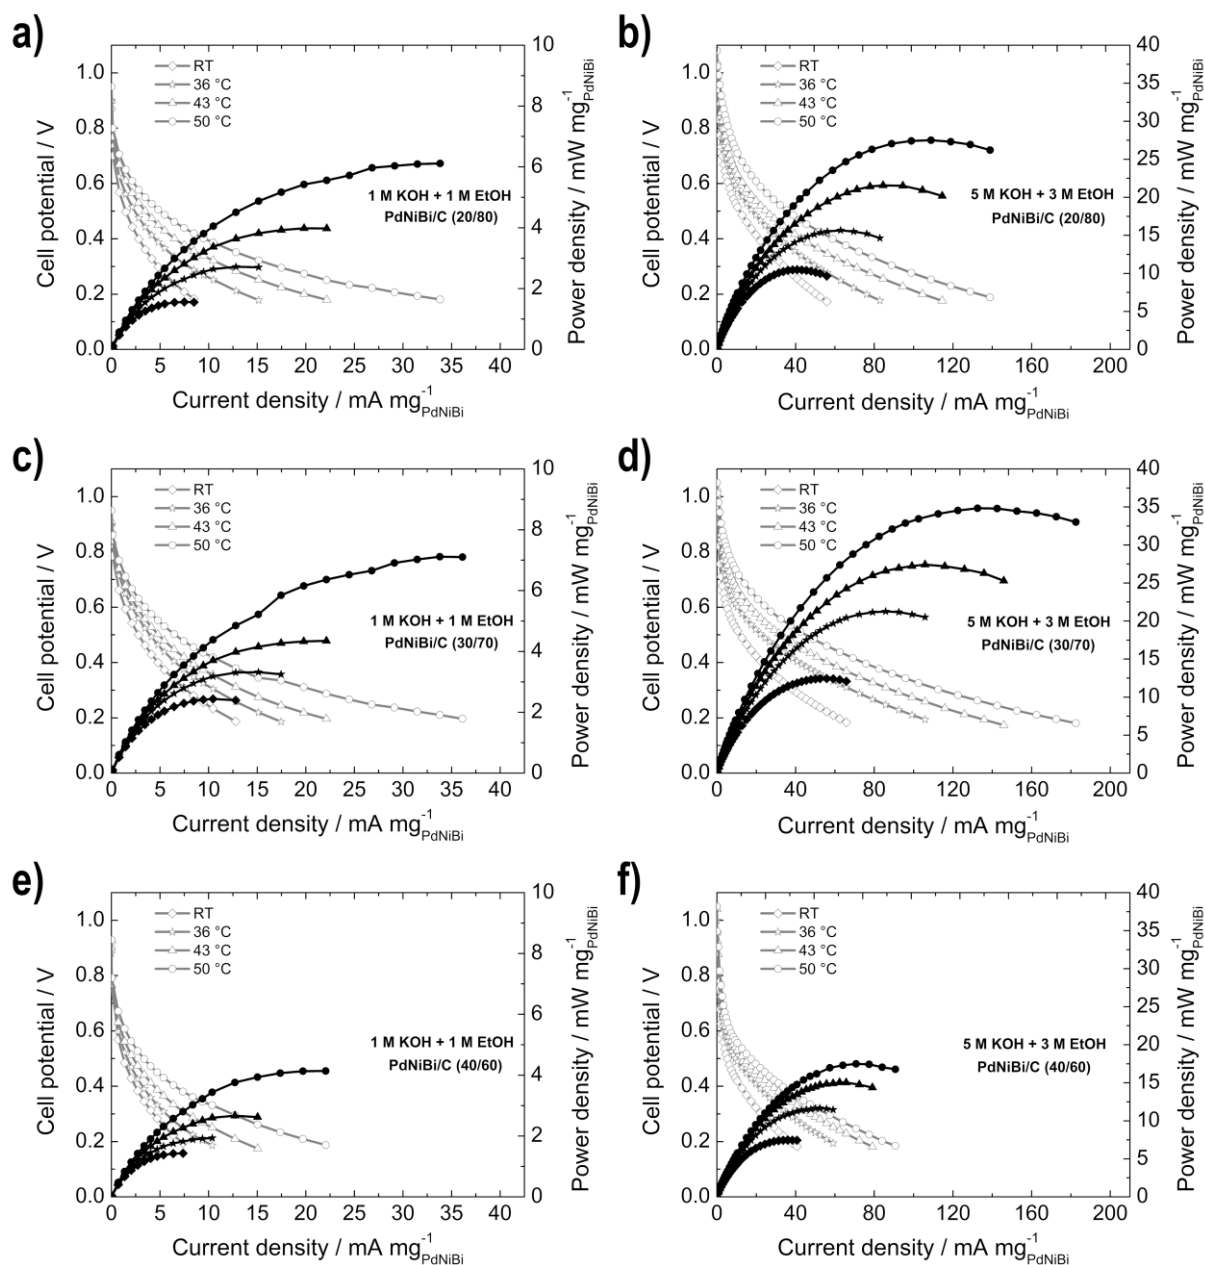

**Figure S4.** Power density (filled symbols) and polarization curves (unfilled symbols) for the single-cell measurements of the different PdNiBi/C electrodes at different temperatures (RT, 36 °C, 43 °C, 50 °C) and different fuel concentrations (a) PdNiBi/C (20/80), 1 M KOH + 1 M EtOH; (b) PdNiBi/C (20/80), 5 M KOH + 3 M EtOH; (c) PdNiBi/C (30/70), 1 M KOH + 1 M EtOH, (d) PdNiBi/C (30/70), 5 M KOH + 3 M EtOH; (e) PdNiBi/C (40/60), 1 M KOH + 1 M EtOH; and (f) PdNiBi/C (40/60), 5 M KOH + 3 M EtOH.
